# Supplementary material for: An airway epithelial IL-17A response signature identifies a steroid-unresponsive COPD patient subgroup
Source: PubMed Central journal article supplement (PMC6307967; doi:10.1172/jci121087), 2018-11-26
Supplement: jci-129-121087-s106.pdf [file jci-129-121087-s106.pdf]

## Supplemental Tables and Figures

**Table S1. Association between 11 gene IL-17 signature metric and 2 alternative IL-17 signature metrics**

|                                | $\rho$ | p-val                  |
|--------------------------------|--------|------------------------|
| <b>Asthma 5 Gene Signature</b> |        |                        |
| BAE                            | 0.51   | $<2.2 \times 10^{-16}$ |
| GLUCOLD                        | 0.49   | $5.01 \times 10^{-6}$  |
| <b>SLC26A4-Guided Metric</b>   |        |                        |
| BAE                            | 0.97   | $<2.2 \times 10^{-16}$ |
| GLUCOLD                        | 0.87   | $<2.2 \times 10^{-16}$ |
| <b>100 Gene Metric</b>         |        |                        |
| BAE                            | 0.72   | $<2.2 \times 10^{-16}$ |
| GLUCOLD                        | 0.49   | $5.01 \times 10^{-6}$  |

**Table S2. Association between IL-17 gene expression and Type 1 inflammation.**

| Gene Symbol | Log Fold Change | p-value               | False Discovery Rate  |
|-------------|-----------------|-----------------------|-----------------------|
| CCL20       | -0.338          | 0.674                 | 0.911                 |
| CSF3        | -0.032          | 0.980                 | 0.999                 |
| CXCL3       | -0.018          | 0.965                 | 0.999                 |
| CXCL5       | -1.258          | 0.073                 | 0.432                 |
| CXCL6       | -1.283          | $7.95 \times 10^{-6}$ | $2.35 \times 10^{-4}$ |
| MTNR1A      | 0.206           | 0.787                 | 0.951                 |
| SAA1        | 1.064           | $5.20 \times 10^{-6}$ | $1.60 \times 10^{-4}$ |
| SAA2        | 0.729           | 0.0001                | 0.002                 |
| SLC26A4     | 0.325           | 0.589                 | 0.911                 |
| TNIP3       | -1.145          | 0.357                 | 0.911                 |
| VNN1        | -0.390          | 0.043                 | 0.305                 |

Log fold gene expression changes, p-values, and false discovery rates for the differential expression of the 11 IL-17 genes in airway epithelial cells exposed to interferon gamma compared to control.

**Table S3. Association between IL-17 gene expression and Type 2 inflammation.**

| <b>Gene Symbol</b> | <b>Log Fold Change</b> | <b>p-value</b>        | <b>False Discovery Rate</b> |
|--------------------|------------------------|-----------------------|-----------------------------|
| CCL20              | -0.387                 | 0.010                 | 0.041                       |
| CSF3               | -0.270                 | 0.003                 | 0.018                       |
| CXCL3              | -0.450                 | 0.002                 | 0.015                       |
| CXCL5              | -0.122                 | 0.142                 | 0.290                       |
| CXCL6              | -0.364                 | 0.001                 | 0.006                       |
| MTNR1A             | -0.005                 | 0.896                 | 0.947                       |
| SAA1               | NA                     | NA                    | NA                          |
| SAA2               | NA                     | NA                    | NA                          |
| SLC26A4            | 0.175                  | 0.451                 | 0.627                       |
| TNIP3              | -0.088                 | 0.384                 | 0.567                       |
| VNN1               | -0.631                 | $8.32 \times 10^{-7}$ | $2.58 \times 10^{-5}$       |

Log fold gene expression changes, p-values, and false discovery rates for the differential expression of the 11 IL-17 genes in Type 2 high asthmatics when compared with Type 2 low asthmatics and healthy controls in global profiling experiment by microarray. NA=gene not measured well on microarray.

**Table S4. Relationship between IL-17 metric and demographics.**

|                             | BAE          |                                 | GLUCOLD      |                             | SPIROMICS    |                             |
|-----------------------------|--------------|---------------------------------|--------------|-----------------------------|--------------|-----------------------------|
|                             |              | p-val                           |              | p-val                       |              | p-val                       |
| Age                         | 0.19         | <b>0.004</b>                    | 0.24         | <b>0.039</b>                | <b>0.20</b>  | <b>0.046</b>                |
| Smoking Status              |              |                                 |              |                             |              |                             |
| Current                     | -0.42 (0.48) | <b>&lt;2.2*10<sup>-16</sup></b> | 0.32 (0.54)  | <b>2.42*10<sup>-6</sup></b> | -0.67 (1.18) | <b>1.35*10<sup>-5</sup></b> |
| Former                      | 0.29 (0.46)  |                                 | -0.23 (0.42) |                             | 0.35 (0.98)  |                             |
| Inhaled Steroid Use         |              |                                 |              |                             |              |                             |
| Yes                         | 0.02 (0.59)  | 0.28                            | NA           | NA                          | 0.34 (1.08)  | 0.25                        |
| No                          | -0.10 (0.59) |                                 | 0.09 (1.50)  |                             |              |                             |
| History of Asthma           |              |                                 |              |                             |              |                             |
| Yes                         | 0.22 (0.37)  | 0.06                            | NA           | NA                          | -0.05 (1.60) | 0.99                        |
| No                          | -0.02 (0.60) |                                 | -0.06 (1.04) |                             |              |                             |
| History of Childhood Asthma |              |                                 |              |                             |              |                             |
| Yes                         | NA           | NA                              | NA           | NA                          | -0.17 (1.25) | 0.91                        |
| No                          |              |                                 |              |                             | -0.03 (1.17) |                             |

For continuous variables rho and p-values from Spearman's correlations are shown. For dichotomous variables means and standard deviations (in parentheses) as well as p-values from Fischer's exact test are given.

**Table S5. IL-17 Dichotomization by Gene Expression Partitioning.**

|            | Steroid Unresponsive | Steroid Responsive |                               |
|------------|----------------------|--------------------|-------------------------------|
| IL-17 High | 9                    | 4                  | Positive Predictive Value 69% |
| IL-17 Low  | 9                    | 12                 | Negative Predictive Value 57% |
|            | Sensitivity 50%      | Specificity 75%    |                               |

**Table S6. IL-17 Dichotomization at Upper Quartile.**

|            | Steroid Unresponsive | Steroid Responsive |                               |
|------------|----------------------|--------------------|-------------------------------|
| IL-17 High | 8                    | 1                  | Positive Predictive Value 89% |
| IL-17 Low  | 10                   | 15                 | Negative Predictive Value 60% |
|            | Sensitivity 44%      | Specificity 94%    |                               |

**Table S7. Inclusion/Exclusion Criteria for the SPIROMICS bronchoscopy sub-study COPD Participants.**

| <b>Inclusion Criteria</b>                                                                                                                                                                                                                                                                                                                                                                                              |
|------------------------------------------------------------------------------------------------------------------------------------------------------------------------------------------------------------------------------------------------------------------------------------------------------------------------------------------------------------------------------------------------------------------------|
| Between age 40 and 80                                                                                                                                                                                                                                                                                                                                                                                                  |
| Able to tolerate and willing to undergo study procedures                                                                                                                                                                                                                                                                                                                                                               |
| >20 pack-year history of smoking                                                                                                                                                                                                                                                                                                                                                                                       |
| Post bronchodilator: FEV1/FVC < 70% and FEV1 > 30% predicted                                                                                                                                                                                                                                                                                                                                                           |
| Able to understand English and/or Spanish                                                                                                                                                                                                                                                                                                                                                                              |
| <b>Exclusion Criteria</b>                                                                                                                                                                                                                                                                                                                                                                                              |
| Women only: Cannot be pregnant at baseline or plan to become pregnant during the course of the study                                                                                                                                                                                                                                                                                                                   |
| Dementia or other cognitive dysfunction which in the opinion of the investigator would prevent the participant from consenting to the study or completing study procedures                                                                                                                                                                                                                                             |
| Has plans to leave the area in the next 3 years                                                                                                                                                                                                                                                                                                                                                                        |
| Smoking history of > 1 pack-year but <20 pack-years                                                                                                                                                                                                                                                                                                                                                                    |
| Has a BMI > 40 kg/m <sup>2</sup> at baseline exam                                                                                                                                                                                                                                                                                                                                                                      |
| Prior significant difficulties with pulmonary function testing                                                                                                                                                                                                                                                                                                                                                         |
| Hypersensitivity to or intolerance of albuterol sulfate or ipratropium bromide or propellants or excipients of the inhalers                                                                                                                                                                                                                                                                                            |
| Non-COPD obstructive lung disease (various bronchiolitis, sarcoid, LAM, histiocytosis X) or parenchymal lung disease, pulmonary vascular disease, pleural disease, severe kyphoscoliosis, neuromuscular weakness, or other conditions, including clinically significant cardiovascular and pulmonary disease, that, in the opinion of the investigator, limit the interpretability of the pulmonary function measures. |
| History of Interstitial lung disease                                                                                                                                                                                                                                                                                                                                                                                   |
| Current diagnosis of asthma                                                                                                                                                                                                                                                                                                                                                                                            |
| History of Lung volume reduction surgery or lung resection                                                                                                                                                                                                                                                                                                                                                             |
| History of lung or other organ transplant                                                                                                                                                                                                                                                                                                                                                                              |
| History of endobronchial valve therapy                                                                                                                                                                                                                                                                                                                                                                                 |
| History of large thoracic metal implants (e.g., AICD and/or pacemaker) that in the opinion of the investigator limit the interpretability of CT scans                                                                                                                                                                                                                                                                  |
| Currently taking $\geq 10$ mg a day/20mg every other day of prednisone or equivalent systemic corticosteroid                                                                                                                                                                                                                                                                                                           |
| Currently taking any immunosuppressive agent                                                                                                                                                                                                                                                                                                                                                                           |
| Current illicit substance abuse, excluding marijuana                                                                                                                                                                                                                                                                                                                                                                   |
| History of or current use of IV Ritalin                                                                                                                                                                                                                                                                                                                                                                                |
| History of or current use of heroin                                                                                                                                                                                                                                                                                                                                                                                    |
| History of illegal IV drug use within the last 10 years or more than 5 instances of illegal IV drug use ever                                                                                                                                                                                                                                                                                                           |
| Known HIV/AIDS infection                                                                                                                                                                                                                                                                                                                                                                                               |
| History of lung cancer or any cancer that spread to multiple locations in the body                                                                                                                                                                                                                                                                                                                                     |
| History of or current exposure to chemotherapy or radiation treatments that, in the opinion of the investigator, limits the interpretability of the pulmonary function measures.                                                                                                                                                                                                                                       |
| Diagnosis of unstable cardiovascular disease including myocardial infarction in the past 6 weeks, uncontrolled congestive heart failure or arrhythmia.                                                                                                                                                                                                                                                                 |
| Bronchoscopy substudy only: Pao <sub>2</sub> /Sao <sub>2</sub> that qualifies them for supplementary oxygen at rest (PaO <sub>2</sub> < 60 or Sao <sub>2</sub> <88%)                                                                                                                                                                                                                                                   |
| Bronchoscopy substudy only: History of cardiac disease or other comorbid condition severe enough to significantly increase risks based on investigator discretion.                                                                                                                                                                                                                                                     |
| Bronchoscopy substudy only: Use of anticoagulation (patients on warfarin or clopidogrel will be excluded, patients on aspirin alone can be studied even with concurrent use)                                                                                                                                                                                                                                           |

**Table S8. RT-PCR primers.**

Probes used a 5' FAM fluorescent probe with a 3' BHQ quencher.

| Gene           | Type          | Sequence                     |
|----------------|---------------|------------------------------|
| <i>CCL20</i>   | outer-forward | GGCTGTGACATCAATGCTATCATC     |
|                | outer-reverse | GTCCAGTGAGGCACAAATTAGATAAG   |
|                | inner-forward | TCTGGAATGGAATTGGACATAGCCCAAG |
|                | inner-reverse | ACCCTCCATGATGTGCAAGTGAAACC   |
|                | probe         | CCAACCCCAGCAAGGTTCTTTCTG     |
| <i>CSF3</i>    | outer-forward | CCTTCCCTGCATTTCTGAGTTT       |
|                | outer-reverse | TGATACTCTCAAGGGTCCCAGGT      |
|                | inner-forward | CCTGGACTGGGAGGTAGATAGGT      |
|                | inner-reverse | CCCTGGCTCTGCAATGGGCACT       |
|                | probe         | GGCTCACAGCGGCTCATC           |
| <i>CXCL3</i>   | outer-forward | CTGCAGGGAATTCACCTCAAG        |
|                | outer-reverse | TCTCTCCTGTCAGTTGGTGCTC       |
|                | inner-forward | AGCCACACTCAAGAATGGGAA        |
|                | inner-reverse | TTTTCGATGATTTTCTGAACCATG     |
|                | probe         | AAGCTTGTCTCAACCCCGCATCCC     |
| <i>CXCL5</i>   | outer-forward | CTCCTTGTGCGCGTGT             |
|                | outer-reverse | GTTCTTCAGGGAGGCTACCACTT      |
|                | inner-forward | AGAGCTGCGTTGCGTTTGT          |
|                | inner-reverse | GGCGAACACTTGCAAGTACTG        |
|                | probe         | TACAGACCACGCAGGGAGTTCATCCC   |
| <i>CXCL6</i>   | outer-forward | TACTTTGAAGAGTGTGGGGGAAAG     |
|                | outer-reverse | GCCTTTTCGGTAAGACTTTAAGGA     |
|                | inner-forward | GCCTACGCTTCTCCCTGAAG         |
|                | inner-reverse | AACCAGTGATTTCTTGTCTACAA      |
|                | probe         | TTGAACCCCTTTGGCAATTGACCA     |
| <i>MTNR1A</i>  | outer-forward | ATATTTAACACGGGTGGAACCTG      |
|                | outer-reverse | ACTTGAGACTGTGGCAGATGTAGC     |
|                | inner-forward | GGAACCTGGGCTATCTGCAC         |
|                | inner-reverse | TGAATATGGAGCCGATGACG         |
|                | probe         | TCAGGCCCATCAGGAACCCACTG      |
| <i>SAA1</i>    | outer-forward | ATCGGCTCAGACAAATACTTCCAT     |
|                | outer-reverse | AGCAGAGTGAAGAGGAAGCTCAGT     |
|                | inner-forward | AAGTGATCAGCGATGCCAGA         |
|                | inner-reverse | TGATCAGCCAGCGAGTCTCT         |
|                | probe         | CCGCACCATGGCCAAAGAATCTCT     |
| <i>SAA2</i>    | outer-forward | GCCTTTGGAACCTGTGCTAAGA       |
|                | outer-reverse | AGAGAATGGAGACACCACACTGAG     |
|                | inner-forward | CCTGTGCTAAGAGGCATGGA         |
|                | inner-reverse | CCACACTGAGCCTTCAGACC         |
|                | probe         | CCATCCACATGCTGAGGGAGCTCA     |
| <i>SLC26A4</i> | outer-forward | TCAAGACATATCTCAGTTGGACCTTT   |
|                | outer-reverse | ACAGTTCCATTGCTGCTGGATAC      |
|                | inner-forward | GGTGAGTTAATGGTGGGATCTG       |
|                | inner-reverse | TGCTGCTGGATACGAGAAAGTG       |
|                | probe         | TGAGCATGGCCCCGACGA           |
| <i>TNIP3</i>   | outer-forward | GTAGCAGAGCTGAAGACGAAACTG     |
|                | outer-reverse | GTCCTCTCTGCTGTGCTC           |
|                | inner-forward | GCGGAAAGATTCTCAGCAC          |
|                | inner-reverse | TGCCTGTCGTCTTTCTCTG          |
|                | probe         | CTGATGCGGATCCTTCTCCCGC       |
| <i>VNN1</i>    | outer-forward | CCCAATTCTTCAAGAGCATTTTCAT    |
|                | outer-reverse | GATGAGAGCGCTTCTATACTGCTG     |
|                | inner-forward | ACTCCTCCTCTCGCAACTGG         |
|                | inner-reverse | CTGCTGGCATAGGAAGTCCA         |
|                | probe         | TCCCCACCCATCCCATTCTGCAG      |

A

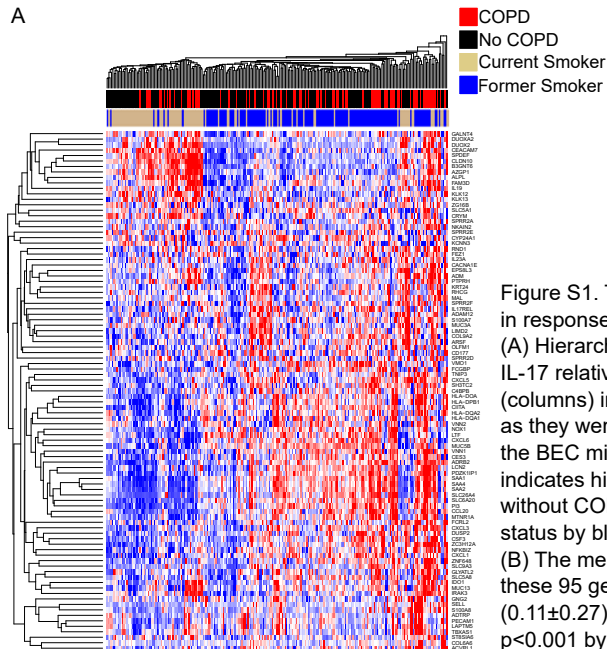

B

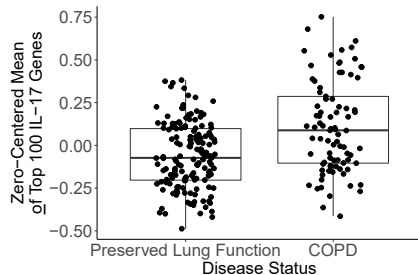

Figure S1. The top 100 genes increased in cultured BECs in response to IL-17 evaluated in the BAE dataset ( $n=237$ ). (A) Hierarchical clustering of the top genes induced by IL-17 relative to vehicle control (rows) across participants (columns) in the BAE dataset. Five genes were excluded as they were not measured or were in low abundance in the BEC microarray dataset. Blue indicates low and red indicates high relative gene expression. Smokers with and without COPD are indicated by red and black and smoking status by blue and tan in the above color bars, respectively. (B) The mean of the zero-centered log<sub>2</sub> expression of these 95 genes is increased in smokers with COPD ( $0.11 \pm 0.27$ ) compared to those without COPD ( $-0.06 \pm 0.19$ ,  $p < 0.001$  by Wilcoxon Rank Sum Test).

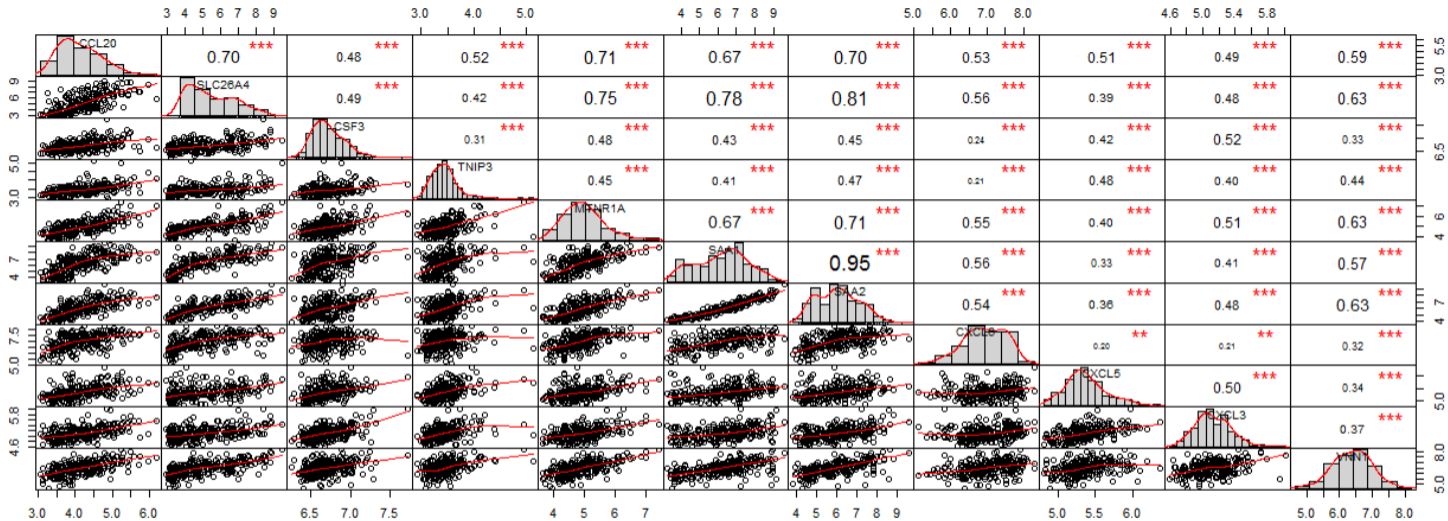

Figure S2. Correlation Matrix of the 11 genes included in the IL-17 signature. The name and distribution of each gene is shown along the diagonal. Below the diagonal are bivariate scatter plots showing the correlation for each gene pair with a line of fit. Above the diagonal are the spearman correlation rho values for each gene pair. Significance levels are indicated by \*\*\*:  $p=0$ , \*\*:  $p<0.001$ .



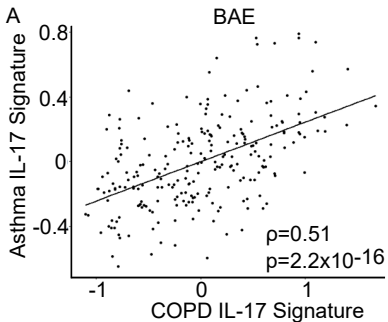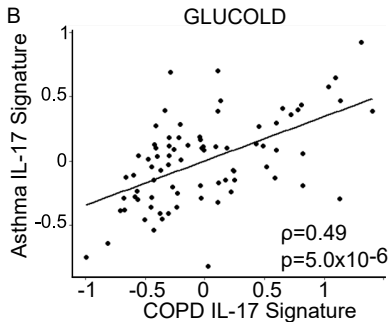

Figure S3. Correlation between the IL-17 signature and a 5 gene IL-17 signature previously evaluated in asthma in (A) the BAE dataset and (B) the GLUCOLD dataset.  $\rho$  and p-values shown for spearman correlation.

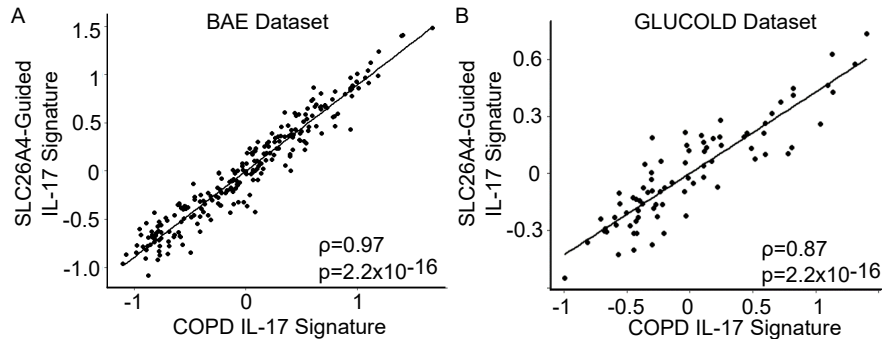

Figure S4. Correlation between the IL-17 signature and an additional IL-17 gene signature generated from the 16 genes selected using an elastic net guided by the gene *SLC26A4* in (A) the BAE dataset and (B) GLUCOLD.  $\rho$  and  $p$ -values shown for spearman correlation.

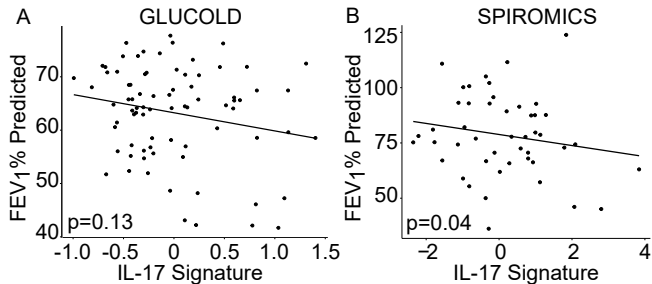

Figure S5. The IL-17 signature is associated with decreasing FEV1% predicted amongst COPD participants. (A) Only a trend in GLUCOLD ( $p=0.13$ ), (B) but significant in SPIROMICS ( $p=0.04$ ). P-values for linear models adjusted for age and smoking status.

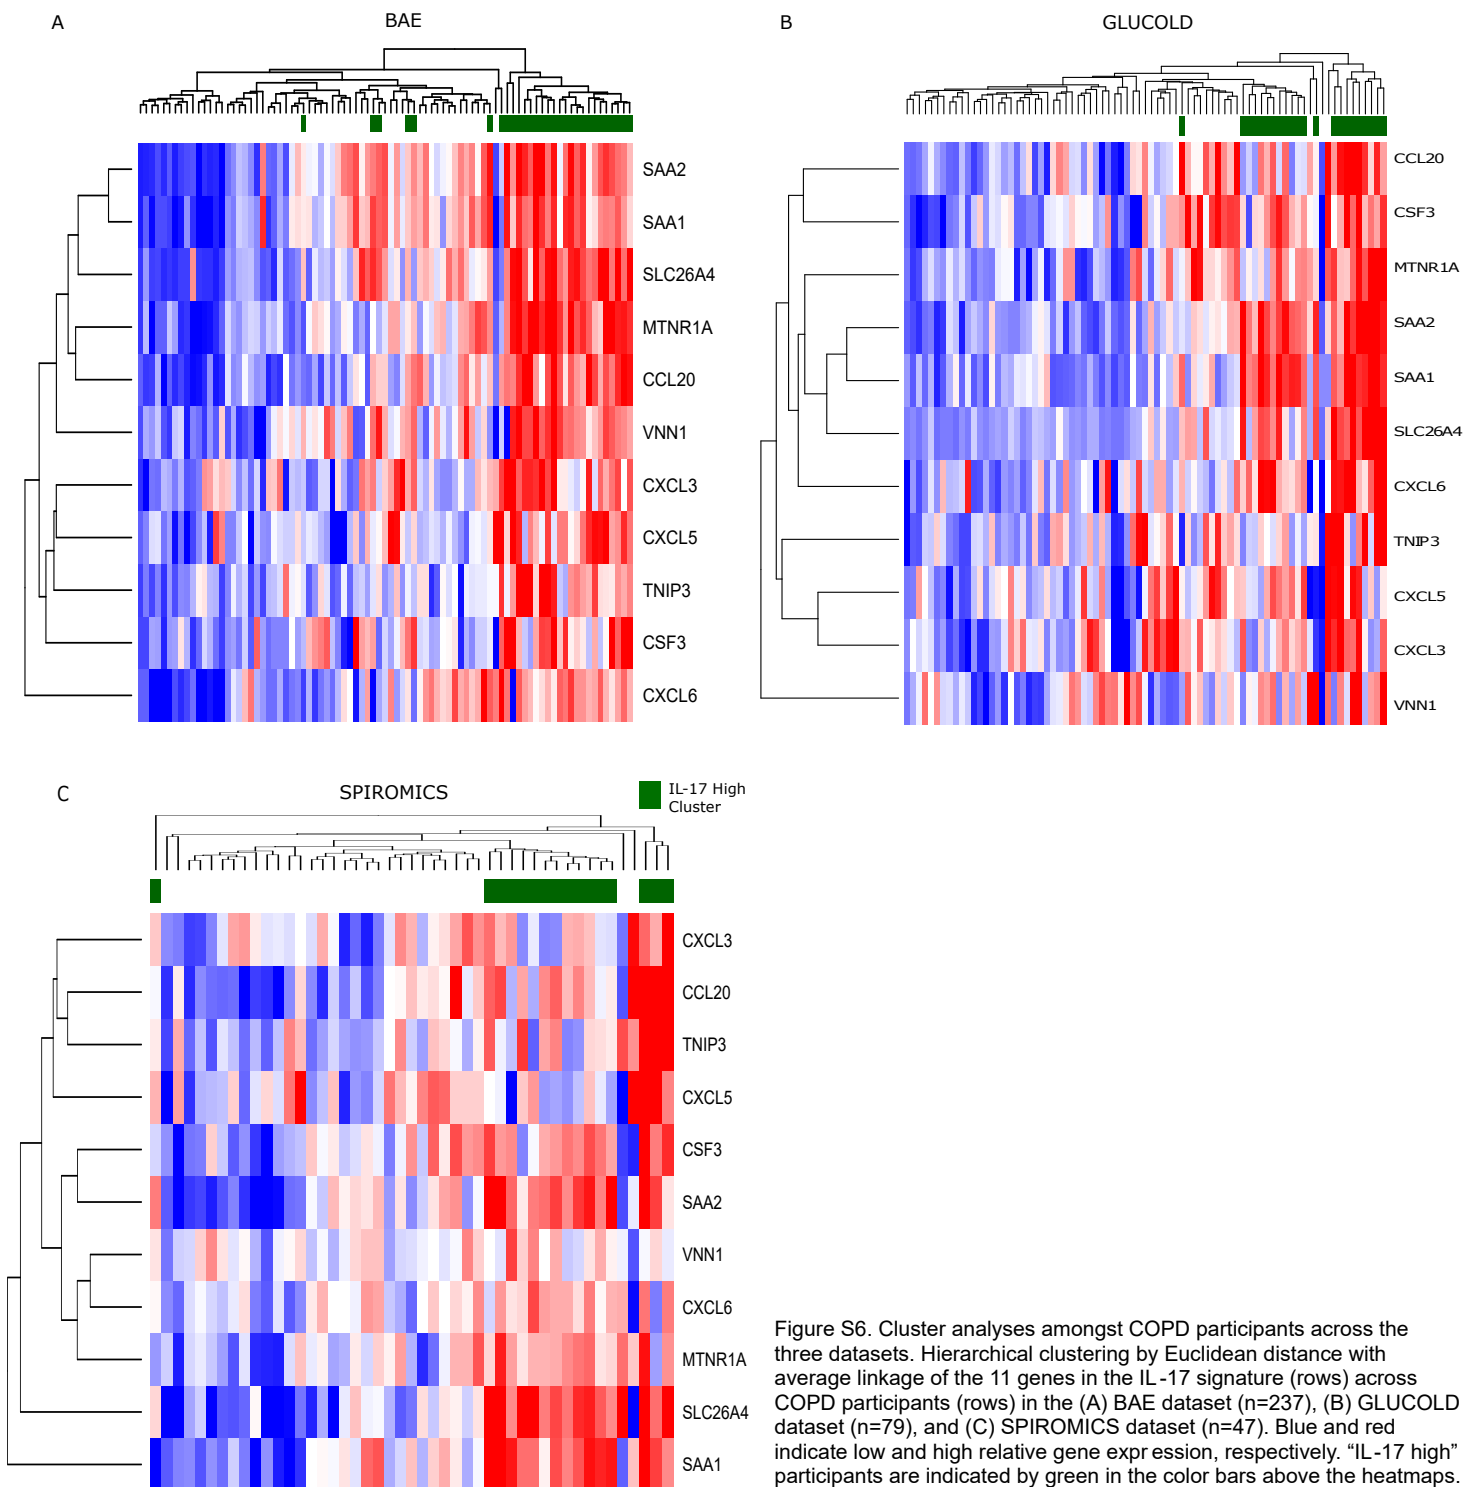

## A. Airway Tissue Eosinophils

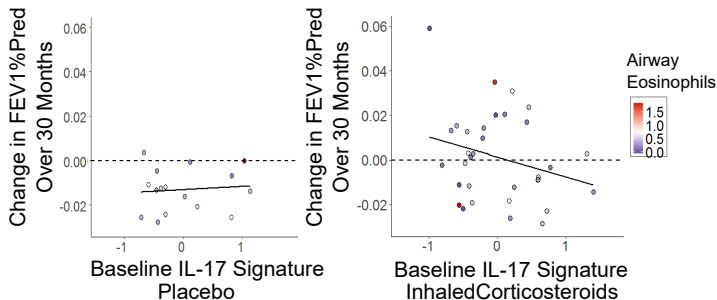

## B. T2S Score

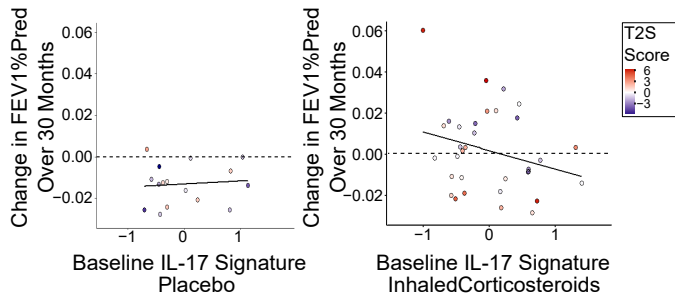

Figure S7. The interaction between the IL-17 signature, Airway Eosinophils or T2S score, and ICS response in GLUCOLD. Increasing IL-17 signature expression was associated with decreasing FEV1 percent change from baseline in GLUCOLD participants on ICS  $\pm$  long acting beta agonist ( $n=33$ ) compared to placebo ( $n=16$ ) at 30 months. This association was not affected by airway eosinophil counts or the Type 2 Signature (T2S) score ( $p=0.027$  and  $0.018$  for the interaction between the IL-17 signature and treatment following adjustment for airway tissue eosinophils or T2S score, respectively, in addition to age and smoking) as shown by the color gradient for (A) airway tissue eosinophils and (B) T2S score.

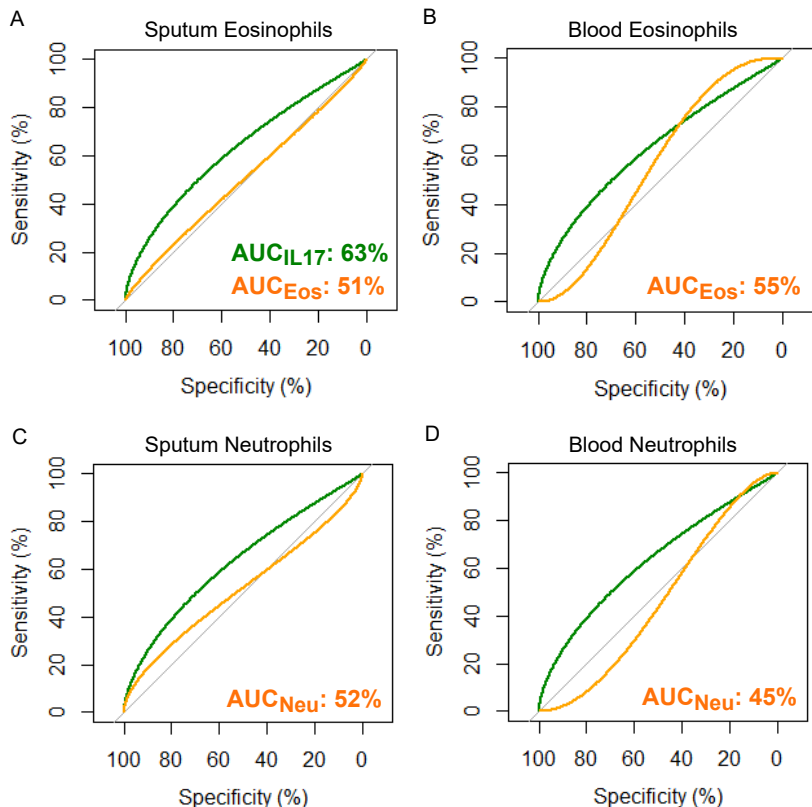

Figure S8. ROC Curves of Steroid Responsiveness for the IL-17 Signature and Cell Count Biomarkers in GLUCOLD. Smoothed Receiver Operator Characteristic (ROC) curves for the IL-17 gene signature in green and cell counts in orange (A. log sputum eosinophils, B. blood eosinophils, C. log sputum neutrophils, D. blood neutrophils) to predict an improvement in FEV1 after 30 weeks of ICS. Area Under the Curve (AUC) shown in green for the IL-17 signature and orange for cell counts. The differences between the IL-17 curve and cell count curves were not statistically significant by bootstrapping (pROC package, R).

**Supplemental Acknowledgements:** The authors thank the SPIROMICS and GLUCOLD participants and participating physicians, investigators and staff for making this research possible. More information about the study and how to access SPIROMICS data is at [www.spiromics.org](http://www.spiromics.org). We would like to acknowledge the following current and former investigators of the SPIROMICS sites and reading centers: Neil E Alexis, PhD; Wayne H Anderson, PhD; R Graham Barr, MD, DrPH; Eugene R Bleecker, MD; Richard C Boucher, MD; Russell P Bowler, MD, PhD; Elizabeth E Carretta, MPH; Stephanie A Christenson, MD; Alejandro P Comellas, MD; Christopher B Cooper, MD, PhD; David J Couper, PhD; Gerard J Criner, MD; Ronald G Crystal, MD; Jeffrey L Curtis, MD; Claire M Doerschuk, MD; Mark T Dransfield, MD; Christine M Freeman, PhD; MeiLan K Han, MD, MS; Nadia N Hansel, MD, MPH; Annette T Hastie, PhD; Eric A Hoffman, PhD; Robert J Kaner, MD; Richard E Kanner, MD; Eric C Kleerup, MD; Jerry A Krishnan, MD, PhD; Lisa M LaVange, PhD; Stephen C Lazarus, MD; Fernando J Martinez, MD, MS; Deborah A Meyers, PhD; Wendy C Moore, MD; John D Newell Jr, MD; Laura Paulin, MD, MHS; Stephen Peters, MD, PhD; Elizabeth C Oelsner, MD, MPH; Wanda K O'Neal, PhD; Victor E Ortega, MD, PhD; Robert Paine, III, MD; Nirupama Putcha, MD, MHS; Stephen I. Rennard, MD; Donald P Tashkin, MD; Mary Beth Scholand, MD; J Michael Wells, MD; Robert A Wise, MD; and Prescott G Woodruff, MD, MPH. The project officers from the Lung Division of the National Heart, Lung, and Blood Institute were Lisa Postow, PhD, and Thomas Croxton, PhD, MD.
